# Supplementary material
Source: PubMed Central journal article supplement (PMC3323036)
Supplement: supp_M111.332171_jbc.M111.332171-1.pdf [file supp_M111.332171_jbc.M111.332171-1.pdf]

## SUPPLEMENTAL DATA

### **The distal heme pocket residues of a B-type Dye-decolorizing peroxidase: arginine but not aspartate is essential for peroxidase activity**

Rahul Singh<sup>1</sup>, Jason C. Grigg<sup>1</sup>, Zachary Armstrong<sup>1</sup>, Michael E.P. Murphy<sup>1</sup>, Lindsay D. Eltis<sup>1\*</sup>

<sup>1</sup>Department of Microbiology and Immunology, Life Sciences Institute, University of British Columbia, Vancouver, British Columbia, Canada.

#### **Table of Contents**

Page S-1 – Supplemental Experimental Procedures  
Page S-2 – Supplemental Table S1  
Page S-3 – Supplemental Table S2  
Page S-4 – Supplemental Figures S1 and S2  
Page S-5 – Supplemental Figure S3  
Page S-6 – Supplemental Figure S4  
Page S-7 – Supplemental Figure S5  
Page S-8 – Supplemental Figure S6  
Page S-9 – Supplemental Figure S7  
Page S-10 – Supplemental Figure S8  
Page S-11 – Supplemental Figure S9

#### **Supplemental Experimental Procedures**

*Construction of DypB variants:* The plasmids carrying genes coding for the D153H (pETDB153H), D153A (pETDB153A), N246H (pETDB246H) and N246A (pETDB246A) were constructed using pETDYB1 as the template DNA and the following 5' phosphorylated forward primers:

1. oD153A: GGATTCGTCGCGGGCACCGAGAAT
2. oN246A: CCTCCGCGACGCGATGGCATTCG
3. oD153H: GGATTCGTCCACGGCACCGAGAAT
4. oN246H: CCTCCGCGACCCACATGGCATTCG

The plasmid carrying the gene encoding the D153A/N246A variant (pETDB153A/246A) was constructed using pETDB153A as the template DNA and the primer oN246A. Mutagenesis was performed using the QuikChange<sup>TM</sup> PCR protocol (Agilent Technologies) with minor modifications. Thus, only forward primer was used for the mutagenesis reaction and the resulting PCR products were digested with DpnI and transformed into *E. coli* Nova Blue electro-competent cells (*recA*<sup>-</sup>, *endA*<sup>-</sup>, *lacI*<sup>q</sup>). The desired mutation was confirmed by sequencing the complete gene length

**Supplemental Table S1.** UV-vis electronic absorption spectroscopy of DypB and the variants. The protein samples were in 20 mM MOPS and 50 mM NaCl at pH 7.5.

| <b>Enzyme</b>            | <b>Soret (nm)</b> | <b><i>R<sub>z</sub></i><br/>(Soret/280)</b> | <b><math>\epsilon</math> (mM<sup>-1</sup> cm<sup>-1</sup>)</b> |
|--------------------------|-------------------|---------------------------------------------|----------------------------------------------------------------|
| <b>DypB<sup>1</sup></b>  | 404               | 2.7                                         | 84                                                             |
| <b>D153H</b>             | 410               | 2.8                                         | 91                                                             |
| <b>D153A</b>             | 404               | 3.0                                         | 120                                                            |
| <b>R244L<sup>2</sup></b> | 410               | 1.8                                         | 80                                                             |
| <b>N246H</b>             | 410               | 4.2                                         | 92                                                             |
| <b>N246A</b>             | 404               | 2.6                                         | 120                                                            |
| <b>D153A /N246A</b>      | 404               | 2.5                                         | 98                                                             |

<sup>1</sup>Obtained from the reference 7

<sup>2</sup>At pH 6, the Soret was recorded at 404 nm and the *R<sub>z</sub>* was 2.9 (Supplemental Figure S1).

**Supplemental Table S2.** Data collection and refinement statistics.

|                                                       | DypB D153A                                                 | DypB D153H                                                 | DypB N246A                                                 | DypB N246H                                                 | DypB R244L                                                 |
|-------------------------------------------------------|------------------------------------------------------------|------------------------------------------------------------|------------------------------------------------------------|------------------------------------------------------------|------------------------------------------------------------|
| Data collection <sup>a</sup>                          |                                                            |                                                            |                                                            |                                                            |                                                            |
| Wavelength (Å)                                        | 0.97952                                                    | 0.97952                                                    | 0.97952                                                    | 0.97952                                                    | 0.97952                                                    |
| Resolution range (Å)                                  | 40.0 – 2.6<br>(2.64 – 2.60)                                | 40.0 – 2.5<br>(2.54 – 2.50)                                | 40.0 – 2.4<br>(2.44 – 2.40)                                | 45.0 – 2.64<br>(2.69 – 2.64)                               | 53.0 – 2.35<br>(2.43 – 2.35)                               |
| Space group                                           | <i>P</i> <sub>3</sub> <i>2</i> <i>1</i>                    |
| Unit cell dimensions (Å)                              | <i>a</i> = 132.4,<br><i>b</i> = 132.4,<br><i>c</i> = 160.6 | <i>a</i> = 132.6,<br><i>b</i> = 132.6,<br><i>c</i> = 159.6 | <i>a</i> = 132.9,<br><i>b</i> = 132.9,<br><i>c</i> = 161.0 | <i>a</i> = 132.3,<br><i>b</i> = 132.3,<br><i>c</i> = 158.8 | <i>a</i> = 133.2,<br><i>b</i> = 133.2,<br><i>c</i> = 158.9 |
| Unique reflections                                    | 50668                                                      | 56625                                                      | 64436                                                      | 49698                                                      | 67842                                                      |
| Completeness (%)                                      | 99.1 (100)                                                 | 99.6 (99.5)                                                | 98.0 (98.6)                                                | 99.5 (99.8)                                                | 99.9 (100)                                                 |
| Average <i>I</i> / $\sigma$ <i>I</i>                  | 21.6 (2.7)                                                 | 19.5 (2.3)                                                 | 22.2 (3.5)                                                 | 19.7 (2.9)                                                 | 15.6 (3.6)                                                 |
| Redundancy                                            | 5.0 (4.7)                                                  | 5.3 (4.3)                                                  | 6.3 (6.4)                                                  | 5.5 (5.2)                                                  | 6.0 (6.0)                                                  |
| <i>R</i> <sub>merge</sub>                             | 0.062 (0.543)                                              | 0.069 (0.627)                                              | 0.070 (0.588)                                              | 0.074 (0.566)                                              | 0.096 (0.516)                                              |
| Wilson B (Å <sup>2</sup> )                            | 57.7                                                       | 54.7                                                       | 50.0                                                       | 60.0                                                       | 44.2                                                       |
| Refinement                                            |                                                            |                                                            |                                                            |                                                            |                                                            |
| <i>R</i> <sub>work</sub> ( <i>R</i> <sub>free</sub> ) | 0.166 (0.213)                                              | 0.184 (0.218)                                              | 0.184 (0.218)                                              | 0.156 (0.205)                                              | 0.186 (0.222)                                              |
| <i>B</i> -factors (Å <sup>2</sup> )                   |                                                            |                                                            |                                                            |                                                            |                                                            |
| All atoms                                             | 51.6                                                       | 48.9                                                       | 44.1                                                       | 51.3                                                       | 39.1                                                       |
| Protein                                               | 51.9                                                       | 49.2                                                       | 44.3                                                       | 51.6                                                       | 39.1                                                       |
| Heme                                                  | 42.8                                                       | 37.9                                                       | 33.3                                                       | 38.7                                                       | 33.4                                                       |
| Water                                                 | 44.3                                                       | 42.1                                                       | 41.0                                                       | 45.3                                                       | 38.2                                                       |
| r.m.s.d. bond length (Å)                              | 0.013                                                      | 0.013                                                      | 0.013                                                      | 0.013                                                      | 0.013                                                      |
| In most-favorable region                              | 90.5                                                       | 91.2                                                       | 91.8                                                       | 90.0                                                       | 92.7                                                       |
| In disallowed regions                                 | 0.0                                                        | 0.1                                                        | 0.4                                                        | 0.0                                                        | 0.1                                                        |
| PDB Accession Codes                                   | 3VEC                                                       | 3VED                                                       | 3VEE                                                       | 3VEF                                                       | 3VEG                                                       |

<sup>a</sup>values for the highest resolution shell are shown in parenthesis

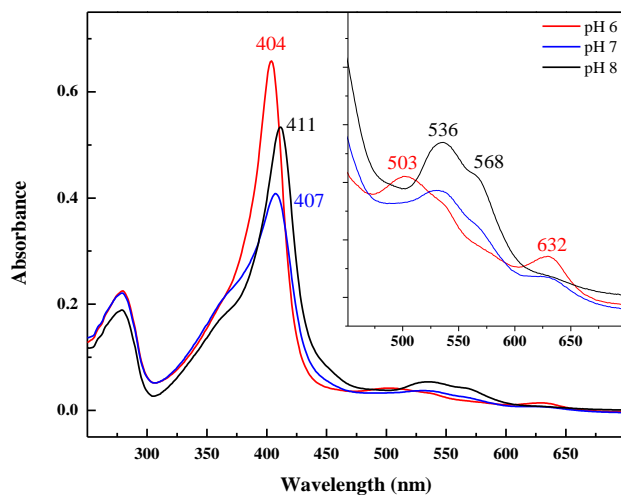

**Supplemental Figure S1.** UV-vis electronic absorption spectrum of purified R244L at pH 8 (black), 7 (blue), and 6 (red). The region between 450-700 nm is shown at greater magnification in the inset.

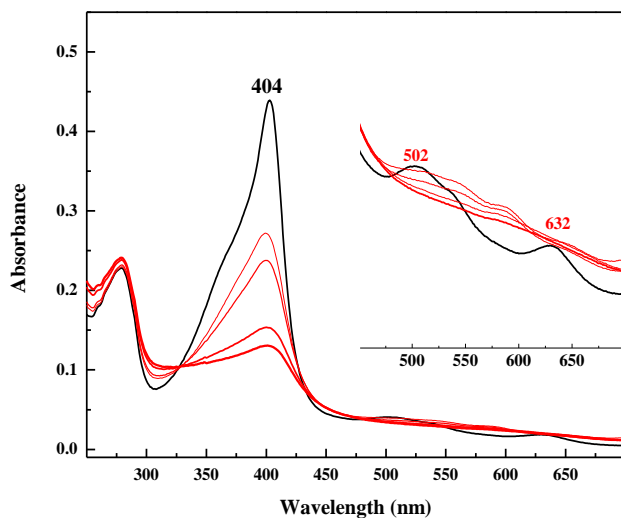

**Supplemental Figure S2.** Reaction of R244L with 1 equivalent of  $\text{H}_2\text{O}_2$  (50 mM sodium succinate, pH 5, 25 °C). Reaction of 5  $\mu\text{M}$  R244L (black) with 5  $\mu\text{M}$   $\text{H}_2\text{O}_2$ . The spectra (thin red to thick red) were recorded at the following time intervals (s): 5, 120, 360, and 1200. The region between 450-700 nm is shown at greater magnification in the inset.

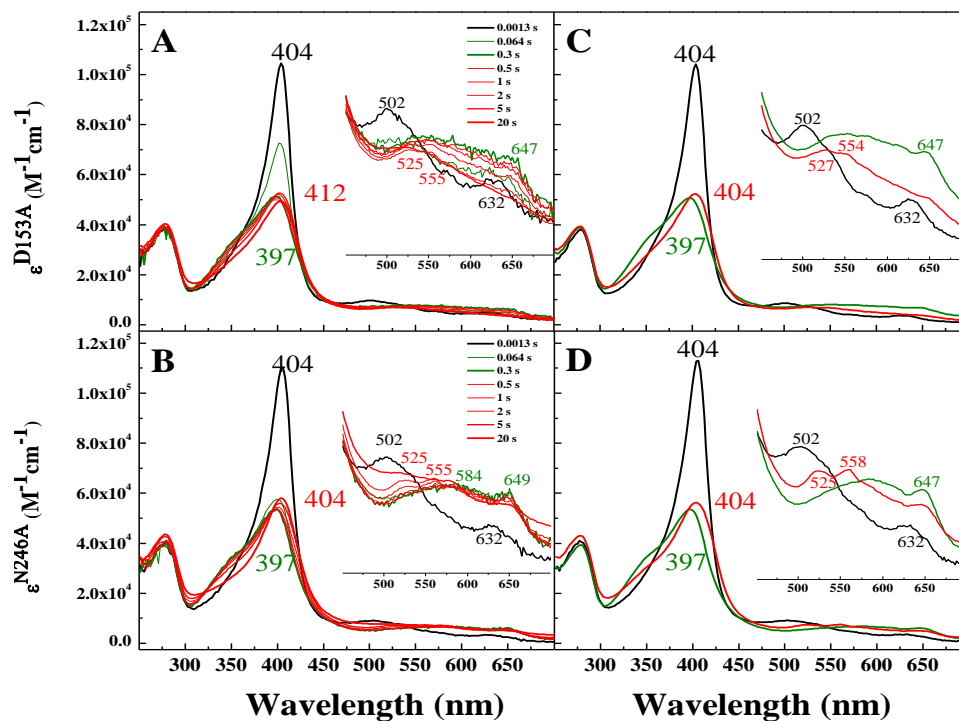

**Supplemental Figure S3.** Stopped-flow analyses of the reaction of D153A and N246A with  $\text{H}_2\text{O}_2$  (50 mM sodium acetate, pH 5.5, 25 °C). Reaction of 10  $\mu\text{M}$  D153A (A) or N246A (B) with an equal volume of 200  $\mu\text{M}$   $\text{H}_2\text{O}_2$ . Calculated spectra for D153A (C) and N246A (D) derived from the SVD analysis of the data from A and B. The region between 450-700 nm is shown at greater magnification in the inset.

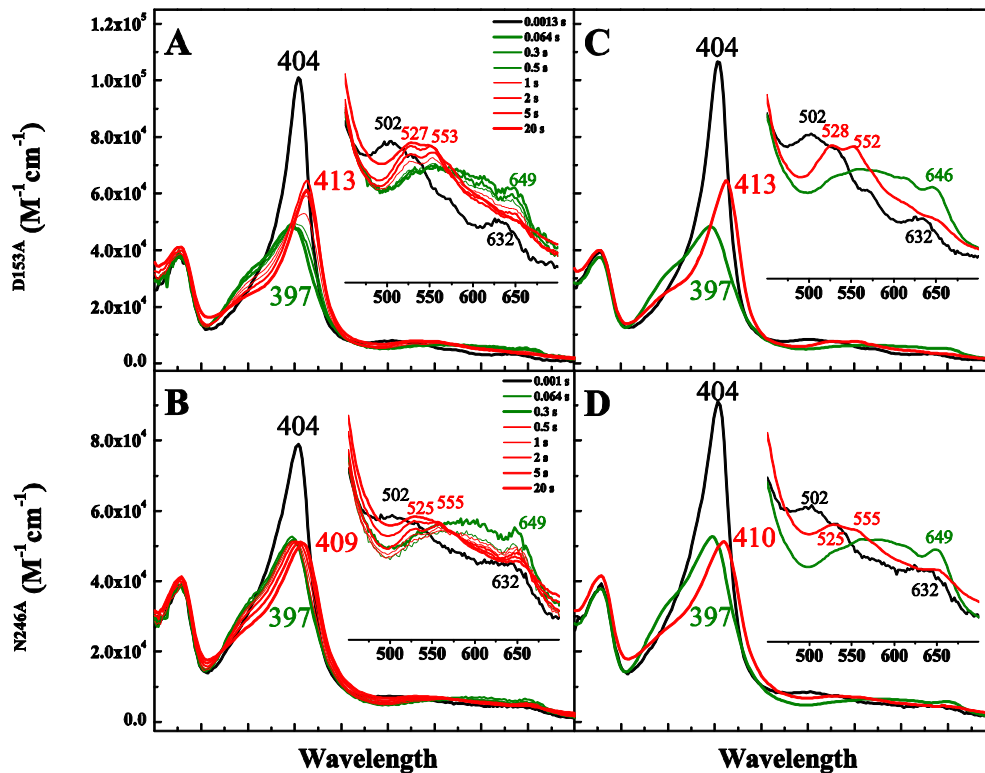

**Supplemental Figure S4.** Stopped-flow analyses of the reaction of D153A, N246A and D153A/N246A with excess of  $\text{H}_2\text{O}_2$  (20 mM MOPS, 50 mM NaCl, pH 7.5, 25 °C). The right panel shows the reaction of 10  $\mu\text{M}$  D153A (A) or N246A (B) with an equal volume of 1000  $\mu\text{M}$   $\text{H}_2\text{O}_2$ . The left panel shows the calculated spectra for D153A (C) or N246A (D) using SVD analysis. The region between 450-700 nm is shown at greater magnification in the inset.

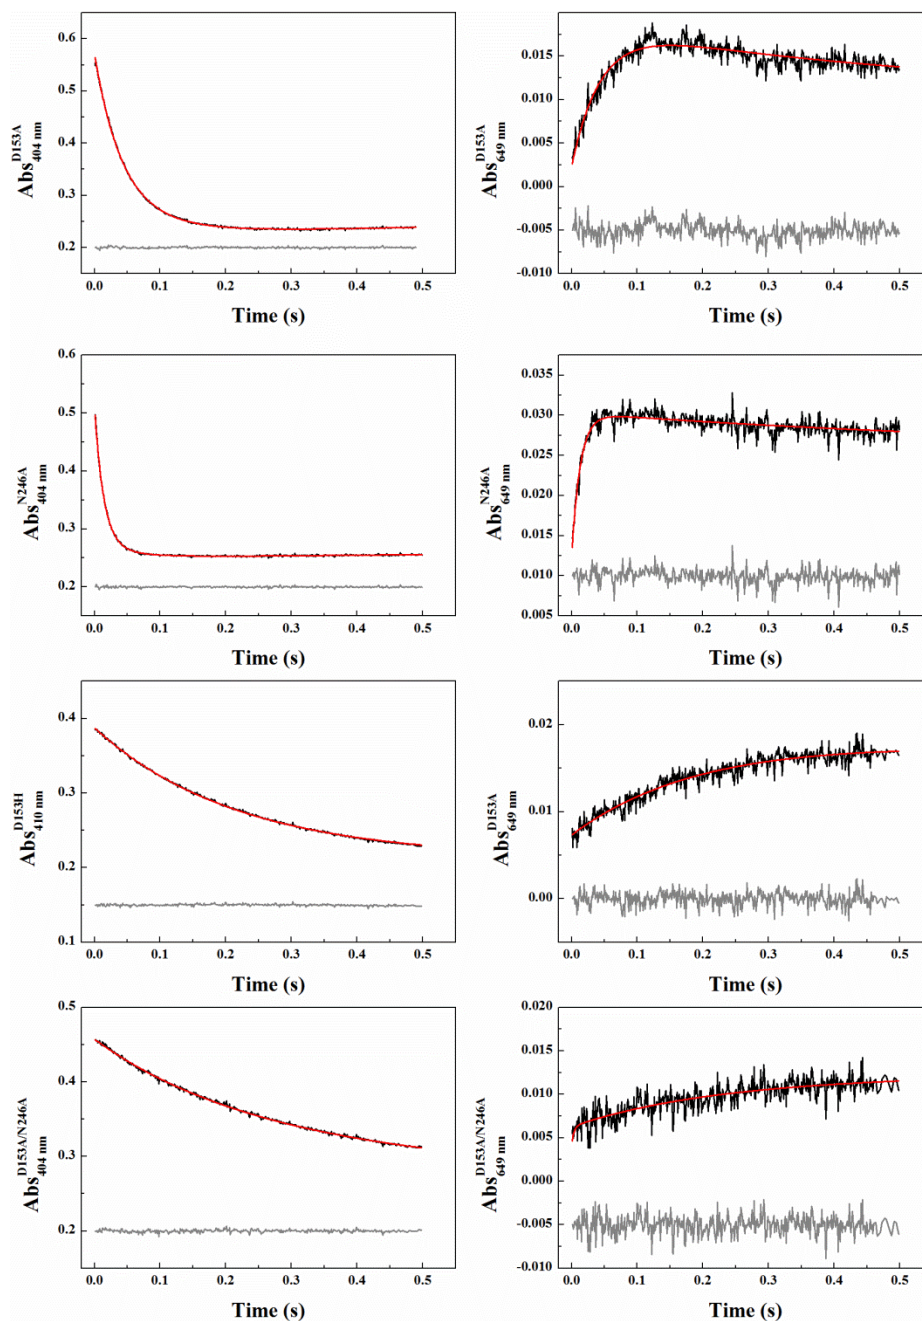

**Supplemental Figure S5.** Time traces of the reaction of DypB variants with  $\text{H}_2\text{O}_2$ . The reactions were followed at 404 nm (410 nm for the D153H variants) (left panel) and 649 nm (right panel) by after mixing 10  $\mu\text{M}$  enzyme with 200  $\mu\text{M}$   $\text{H}_2\text{O}_2$ . Red curves show the fits of single-exponential decays to the data and the residual is shown in grey.

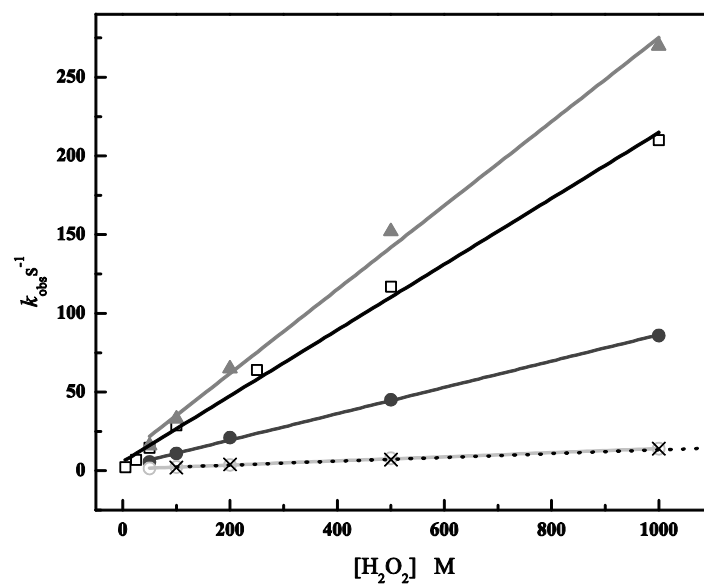

**Supplemental Figure S6.** Plots of  $k_{\text{obs}}$  vs.  $[\text{H}_2\text{O}_2]$  to determine second order rate constants at 404 nm for DypB (Black open square), D153A (Dark gray close circle), D153H (Black cross) N246A (Gray close triangle) and D153A/N246A (Light-gray open circle).



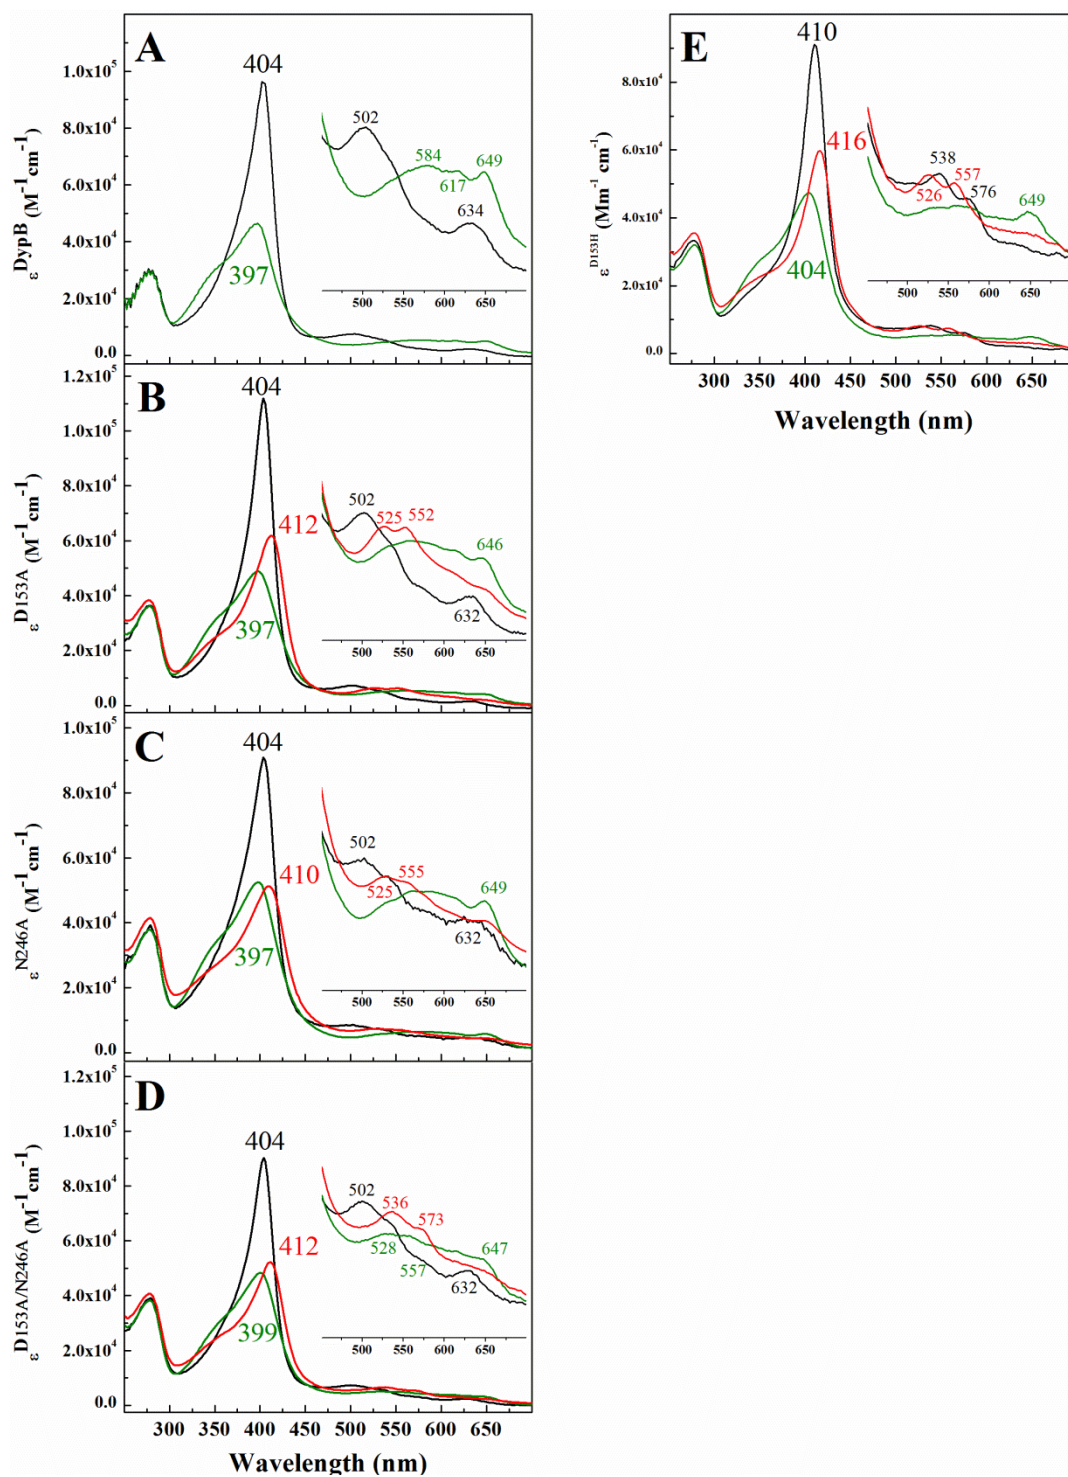

**Supplemental Figure S7.** Calculated spectra of the data shown in Figure 3 using singular-value decomposition (SVD). The data for DypB (A) was fitted to two step model while the data for D153A (B), N246A (C) and D153A/N246A (D) was fitted to three step model. The black spectrum corresponds to the ferric enzyme. The transitions to the first and second intermediates are shown in green and red, respectively. The region between 450-700 nm is shown at greater magnification in the inset.

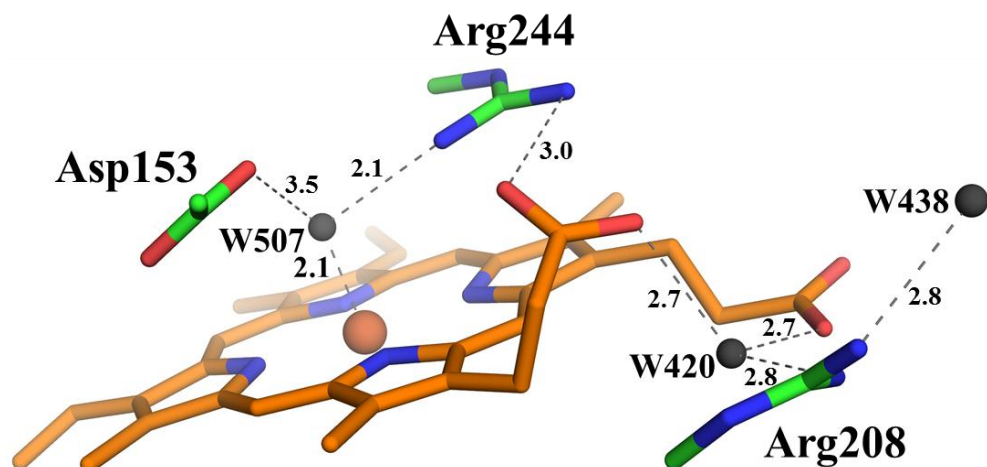

**Supplemental Figure S8.** Conserved hydrogen bond network in DypB involving Asp153, Water (W) 507, Arg244, Heme propionates, W420, Arg208 and W438. Only side chains of the residues are shown. Non-covalent bonds are shown in grey as dashed lines and the atomic distances are shown in Å. The atoms are colored as follows: heme carbon, orange; residue carbons, cyan; nitrogen, blue; oxygen, red; iron, brown; and solvent species oxygen, gray. The figure was generated using coordinates from PDB ID 3QNS.

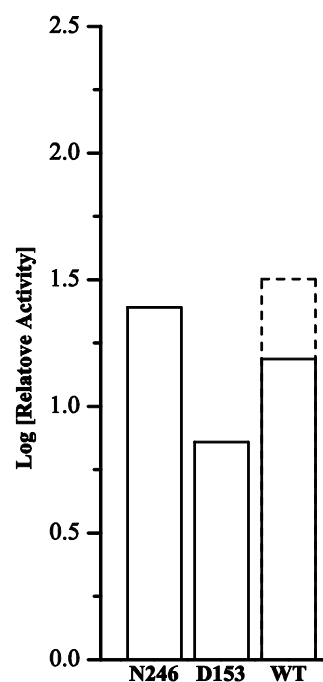

**Supplemental Figure S9.** Inverse analysis of Asp153 and Asn246 on Compound I formation. The log of the  $k_1$  values of each variant and WT *versus* D153A/N246A are plotted. The dashed bars plotted for WT DypB represent what the relative  $k_1$  values of the WT and the D153A/N246A would be if the effects of the two sets of substitutions was additive.
